# Supplementary material for: Linking plasmid-based beta-lactamases to their bacterial hosts using single-cell fusion PCR
Source: eLife journal article supplement (doi:10.7554/elife.66834), 2021-07-20
Supplement: supp [file elife_poa_e66834_Figure_1_figure_supplement_1.pdf › elife_poa_e66834_Figure_1_figure_supplement_1.pdf]

Target Gene

16S Gene

Illumina Adapter

a) OIL FUSION PCR

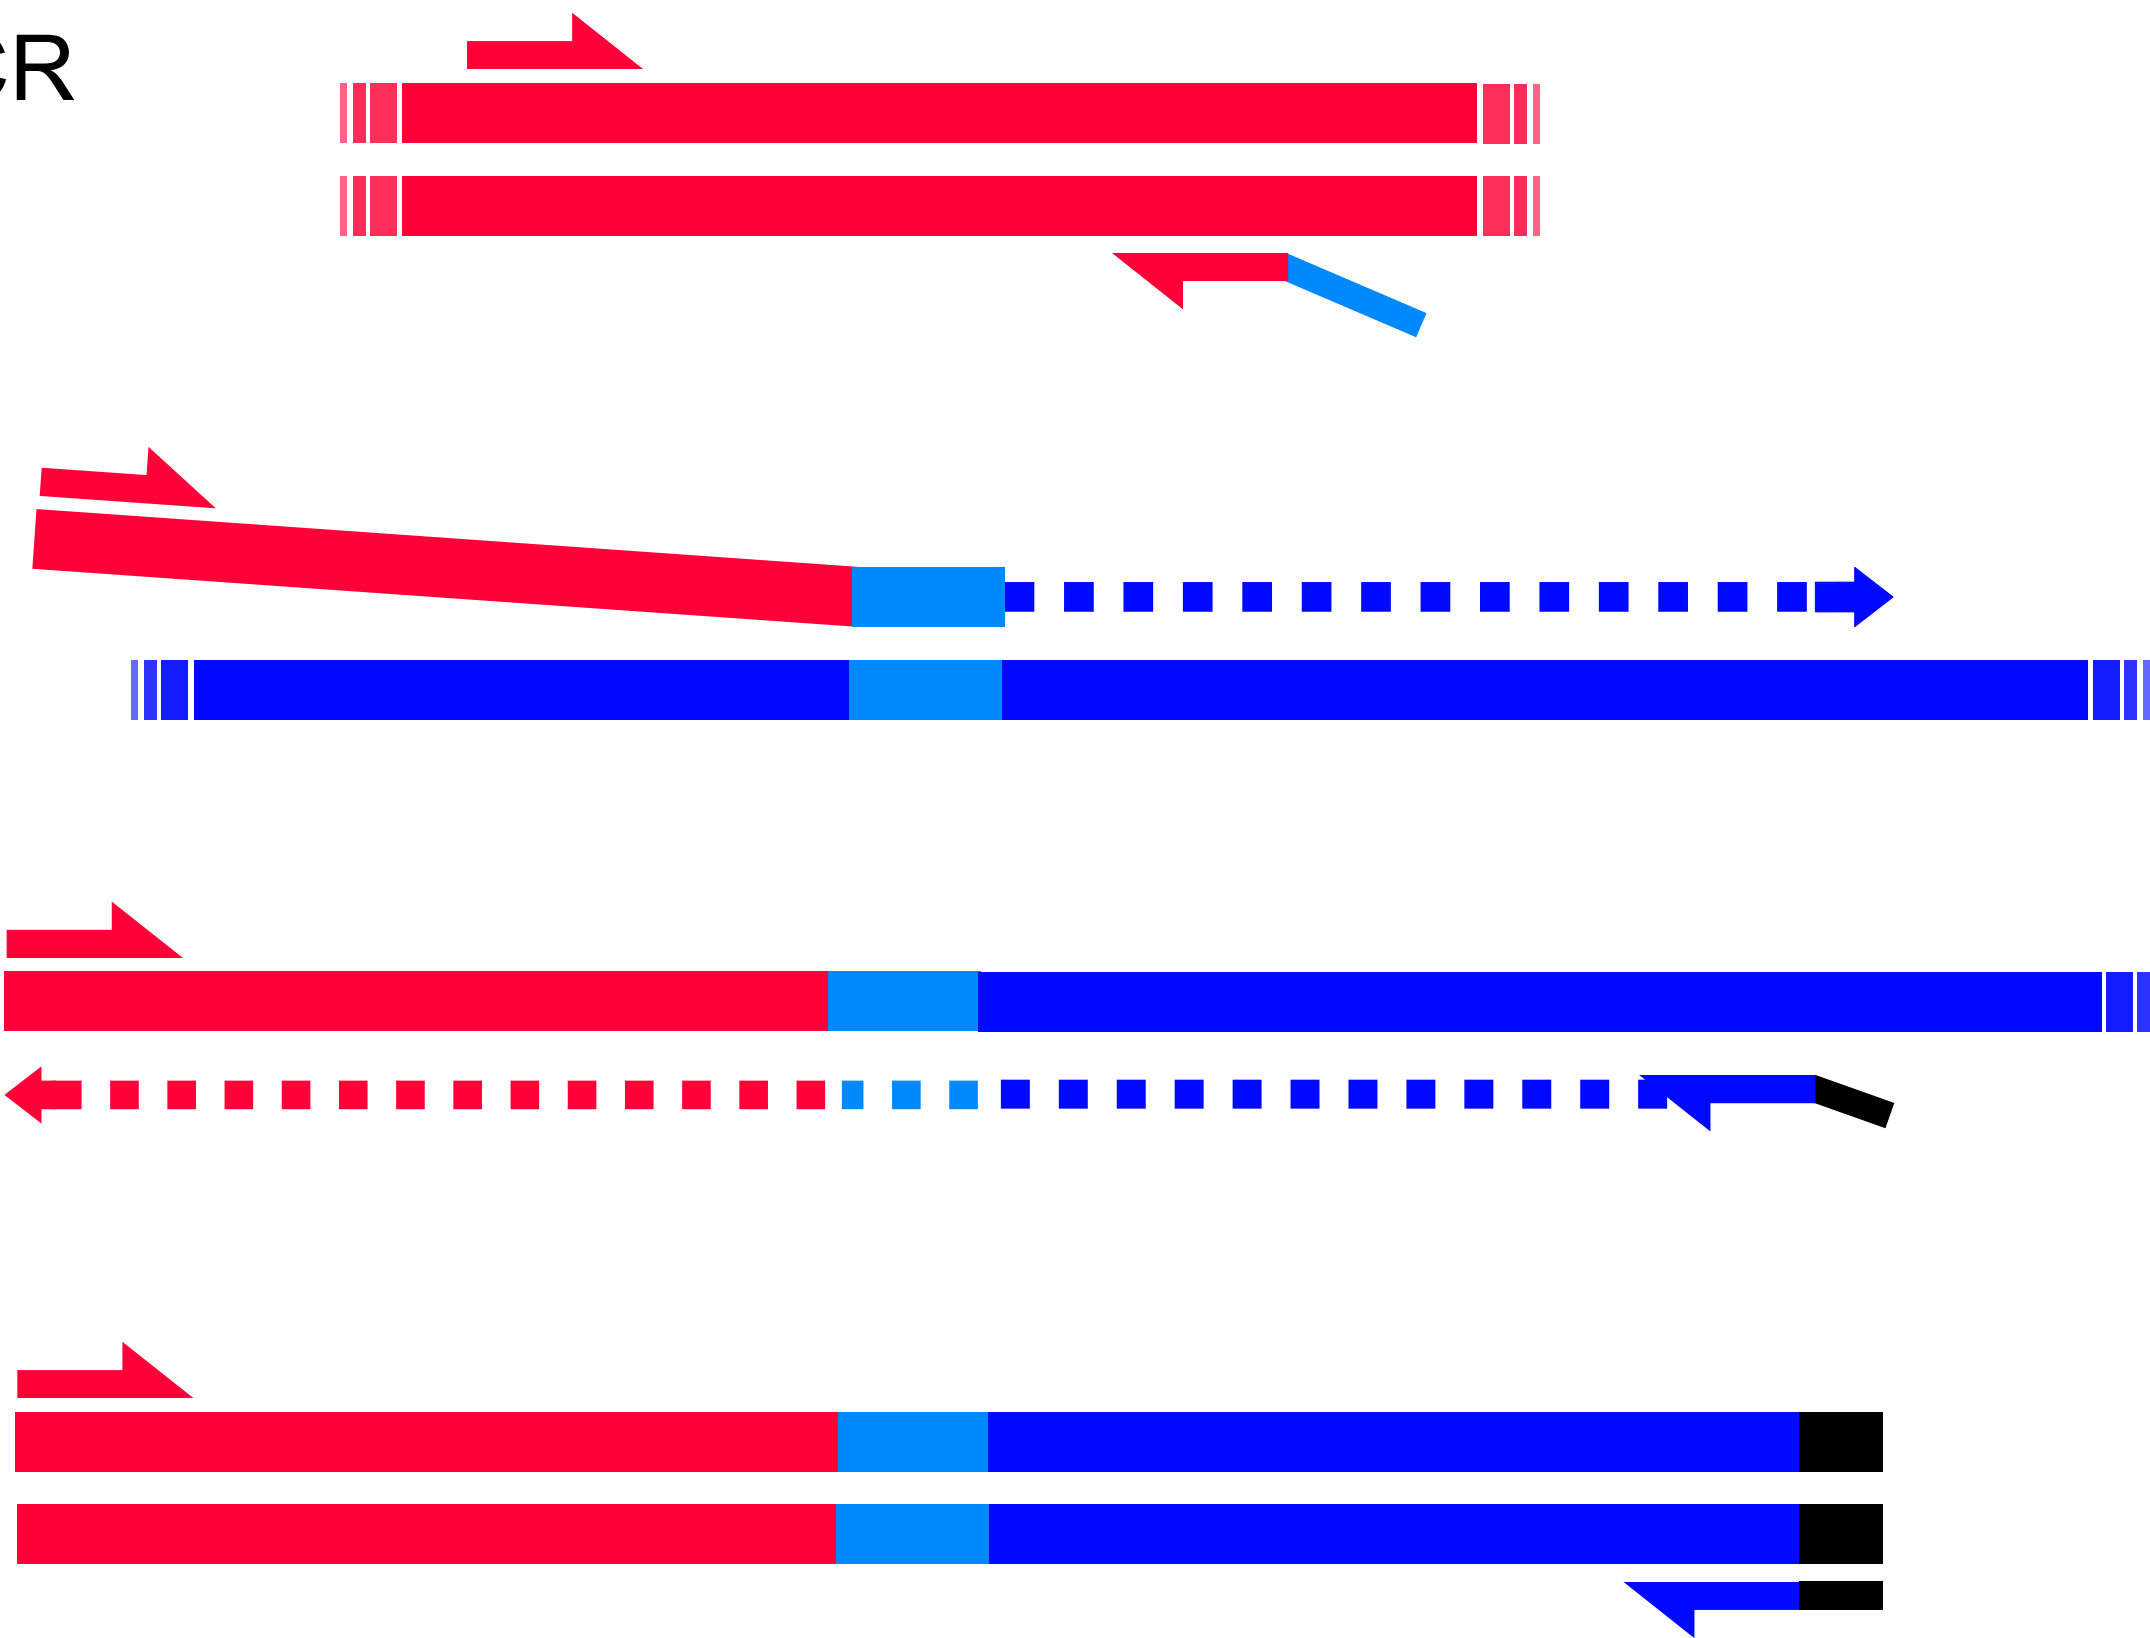

b) Nested PCR

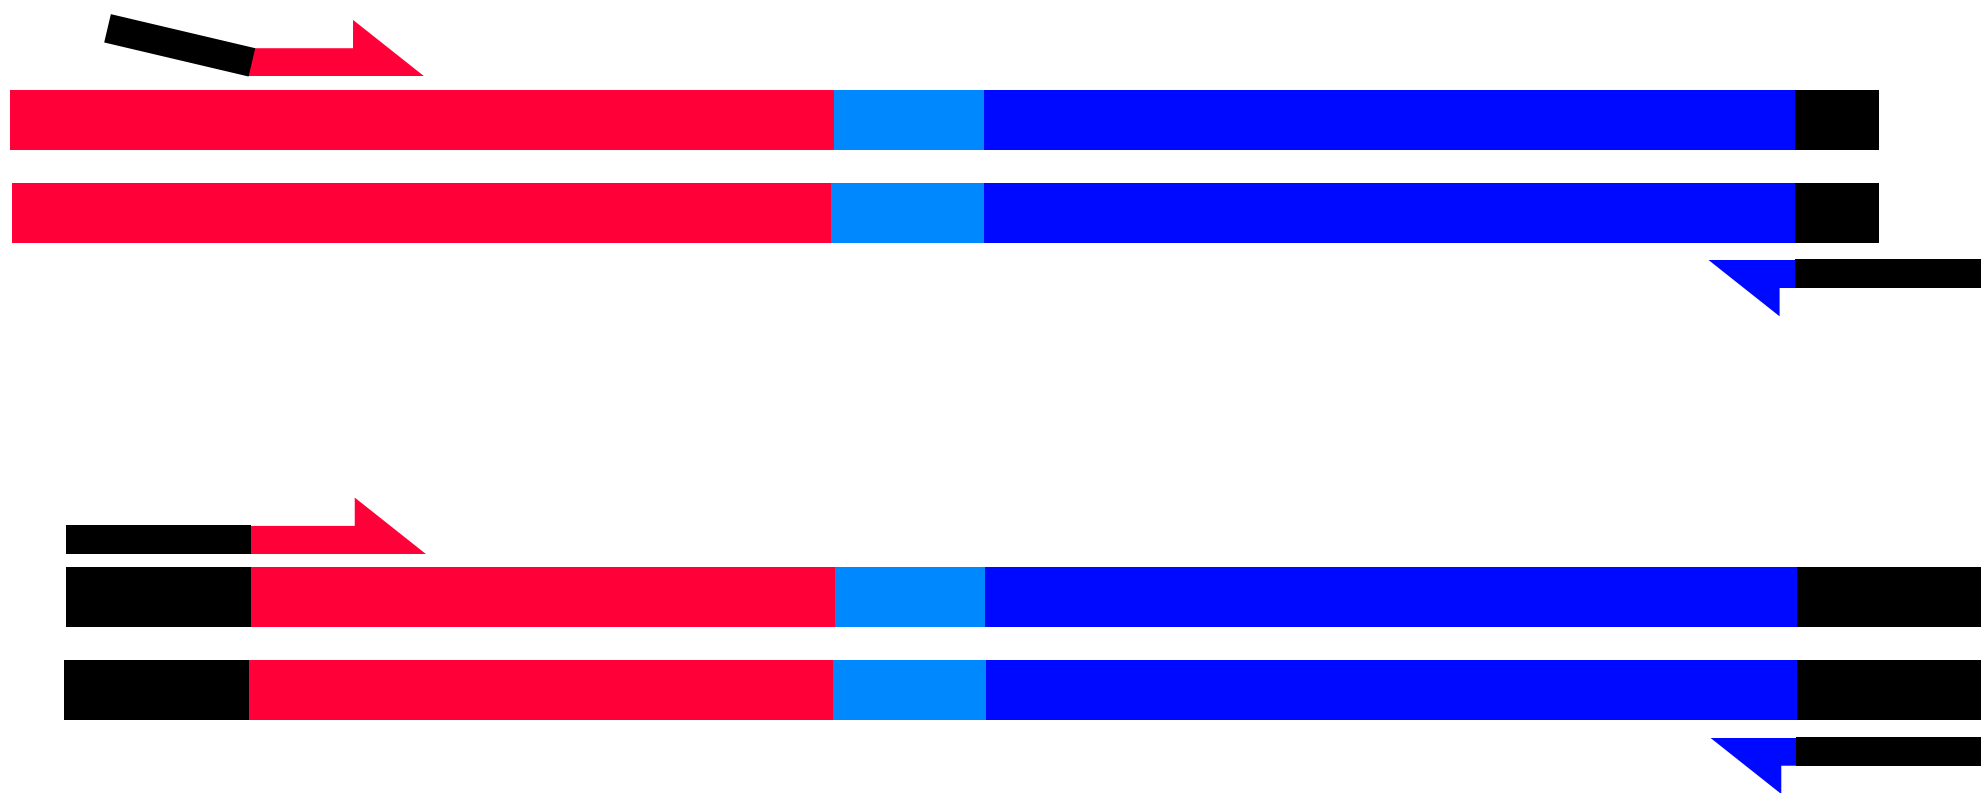

c) Blocking Primers

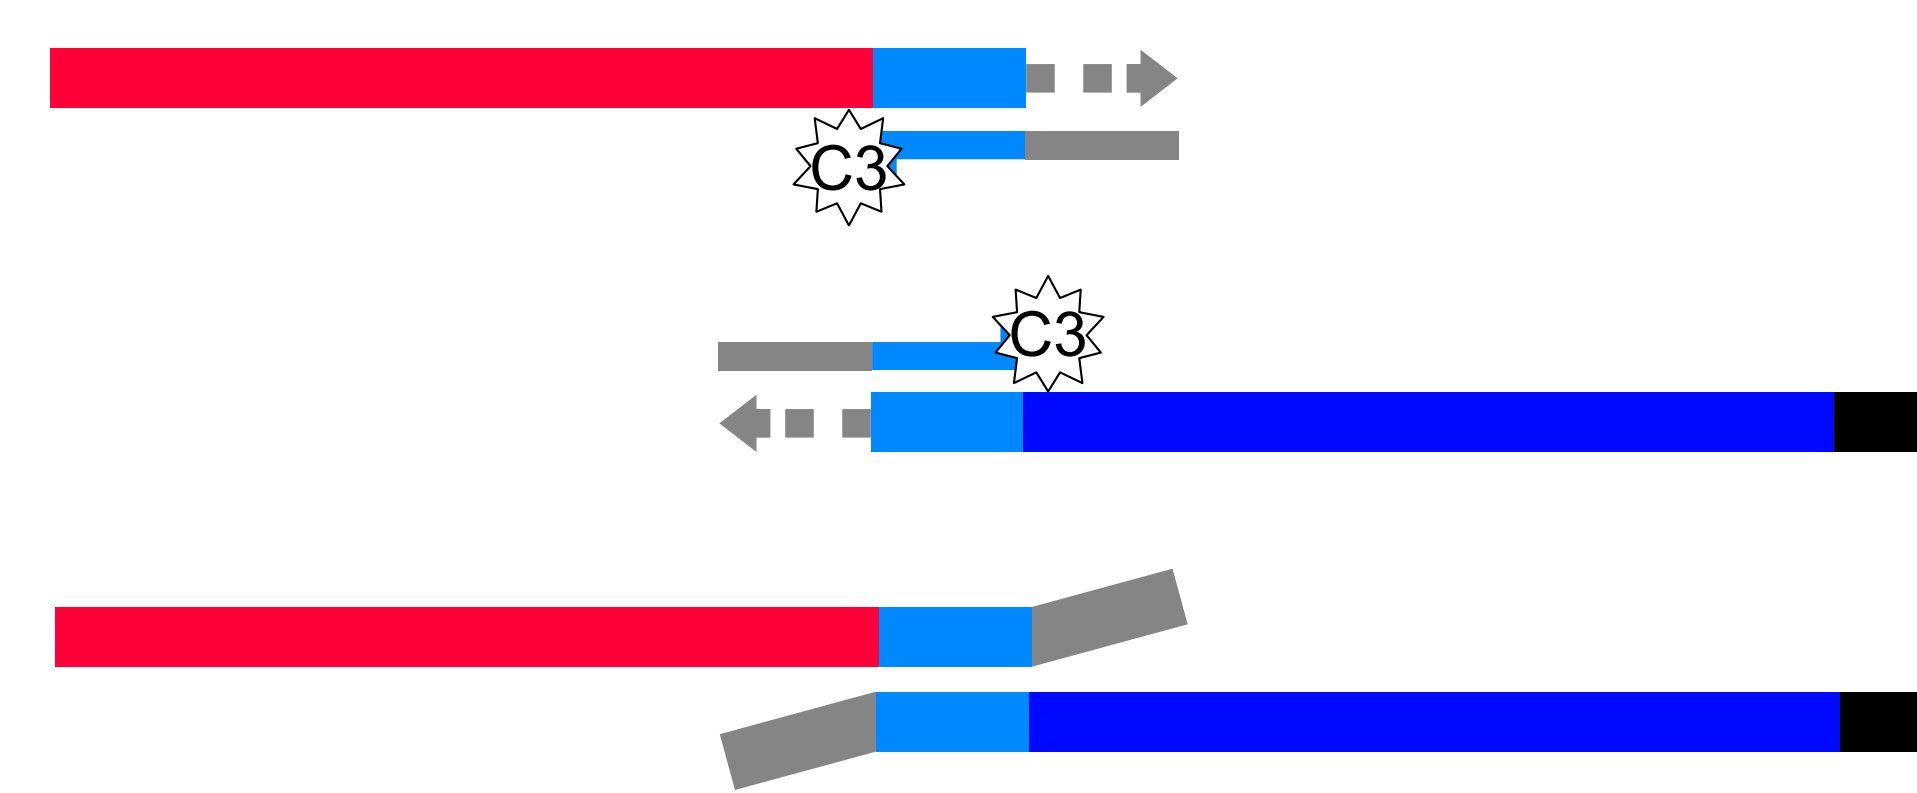

Poly T Tail

C3 3 Carbon Spacer
