# Supplementary figures and images for: Linking plasmid-based beta-lactamases to their bacterial hosts using single-cell fusion PCR
Source: eLife journal article supplement (doi:10.7554/elife.66834), 2021-07-20

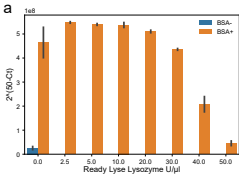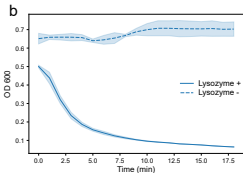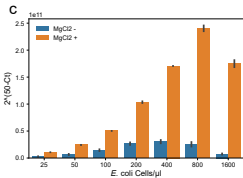

Supplement: supp [file elife_poa_e66834_Figure_1_figure_supplement_2.pdf › elife_poa_e66834_Figure_1_figure_supplement_2.pdf]

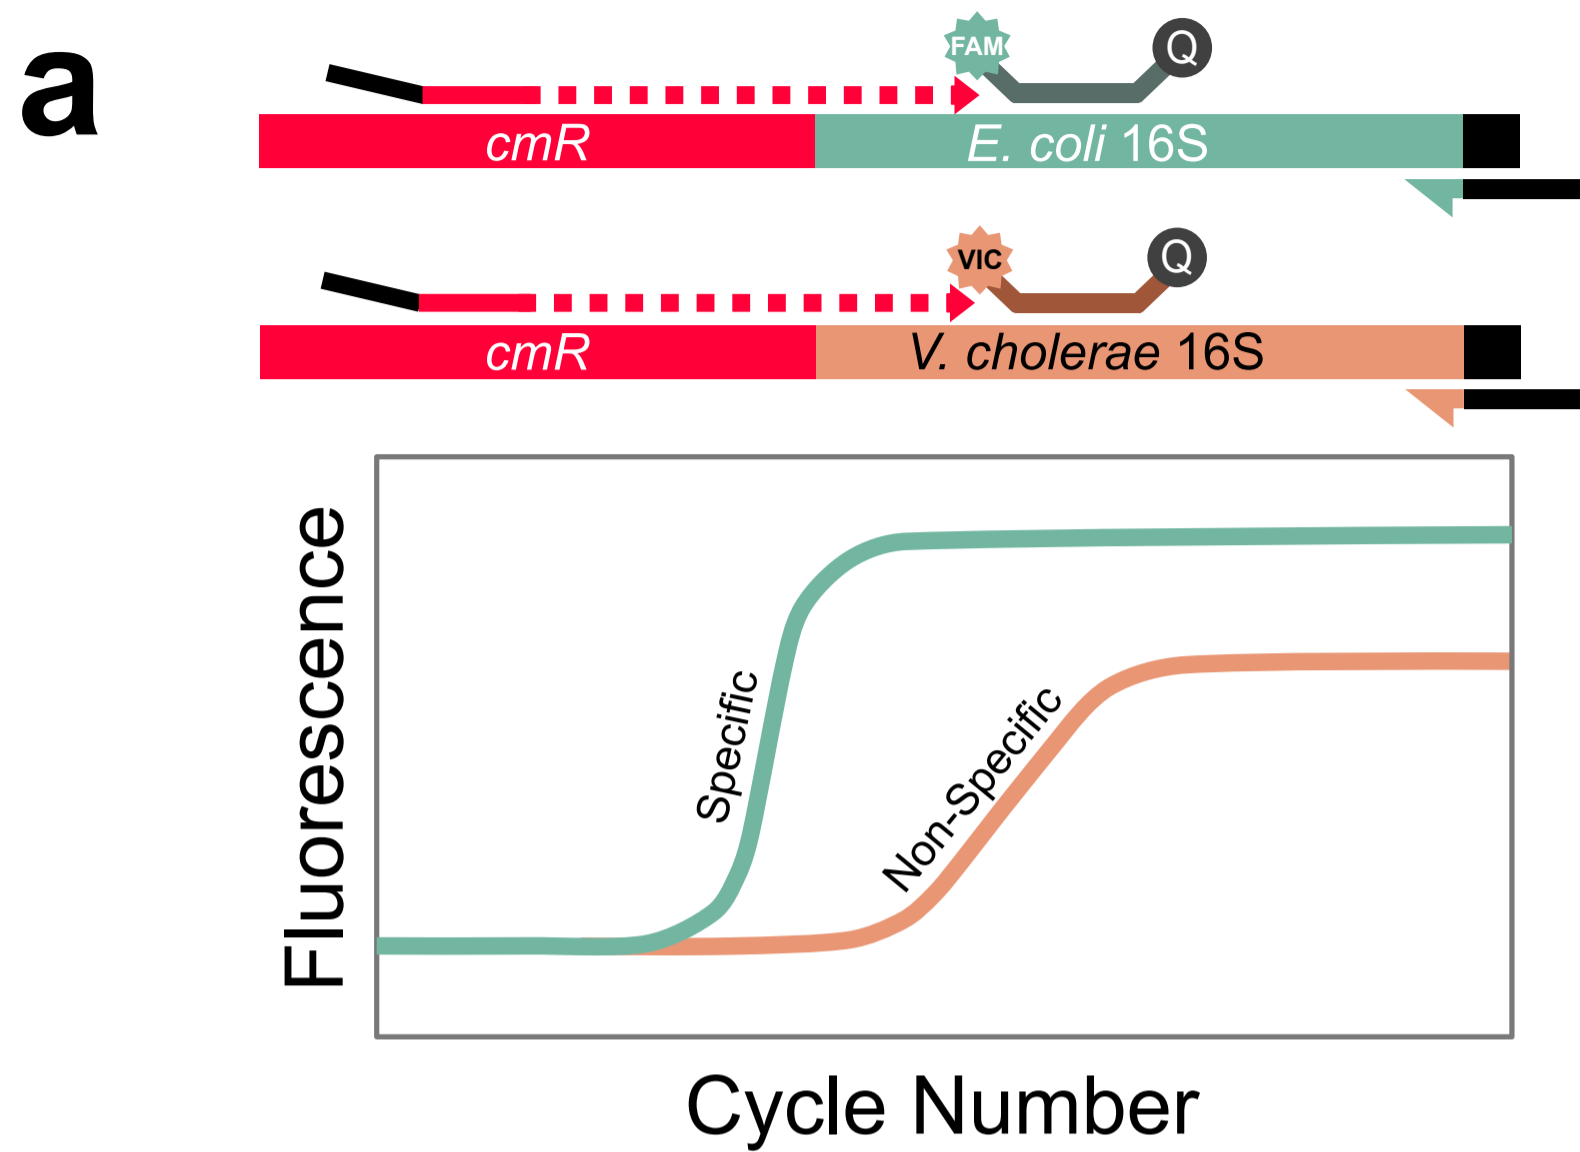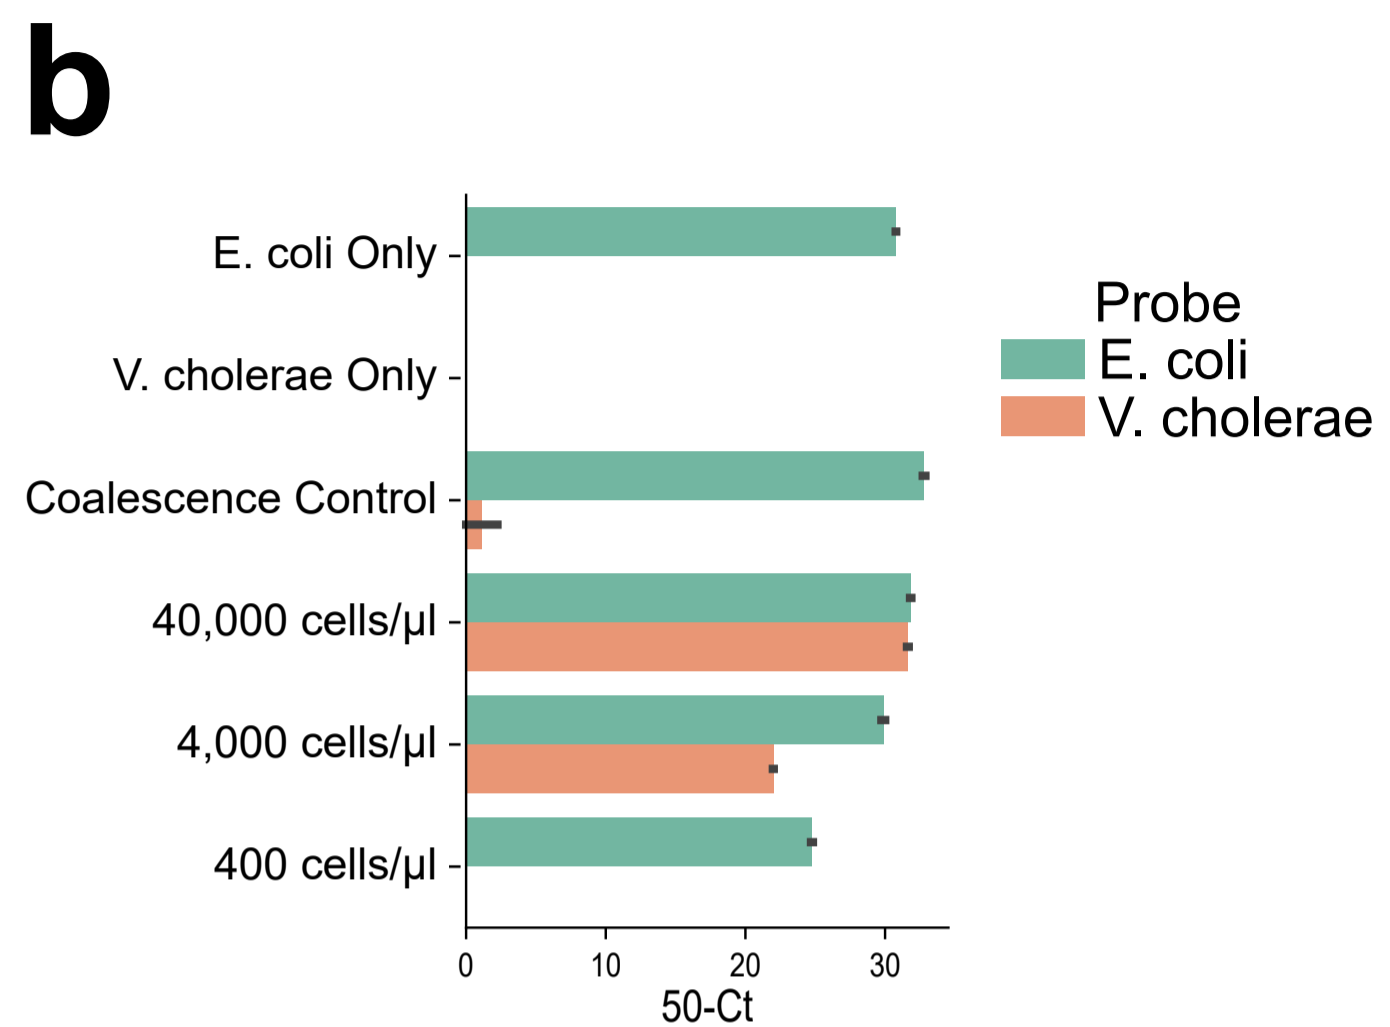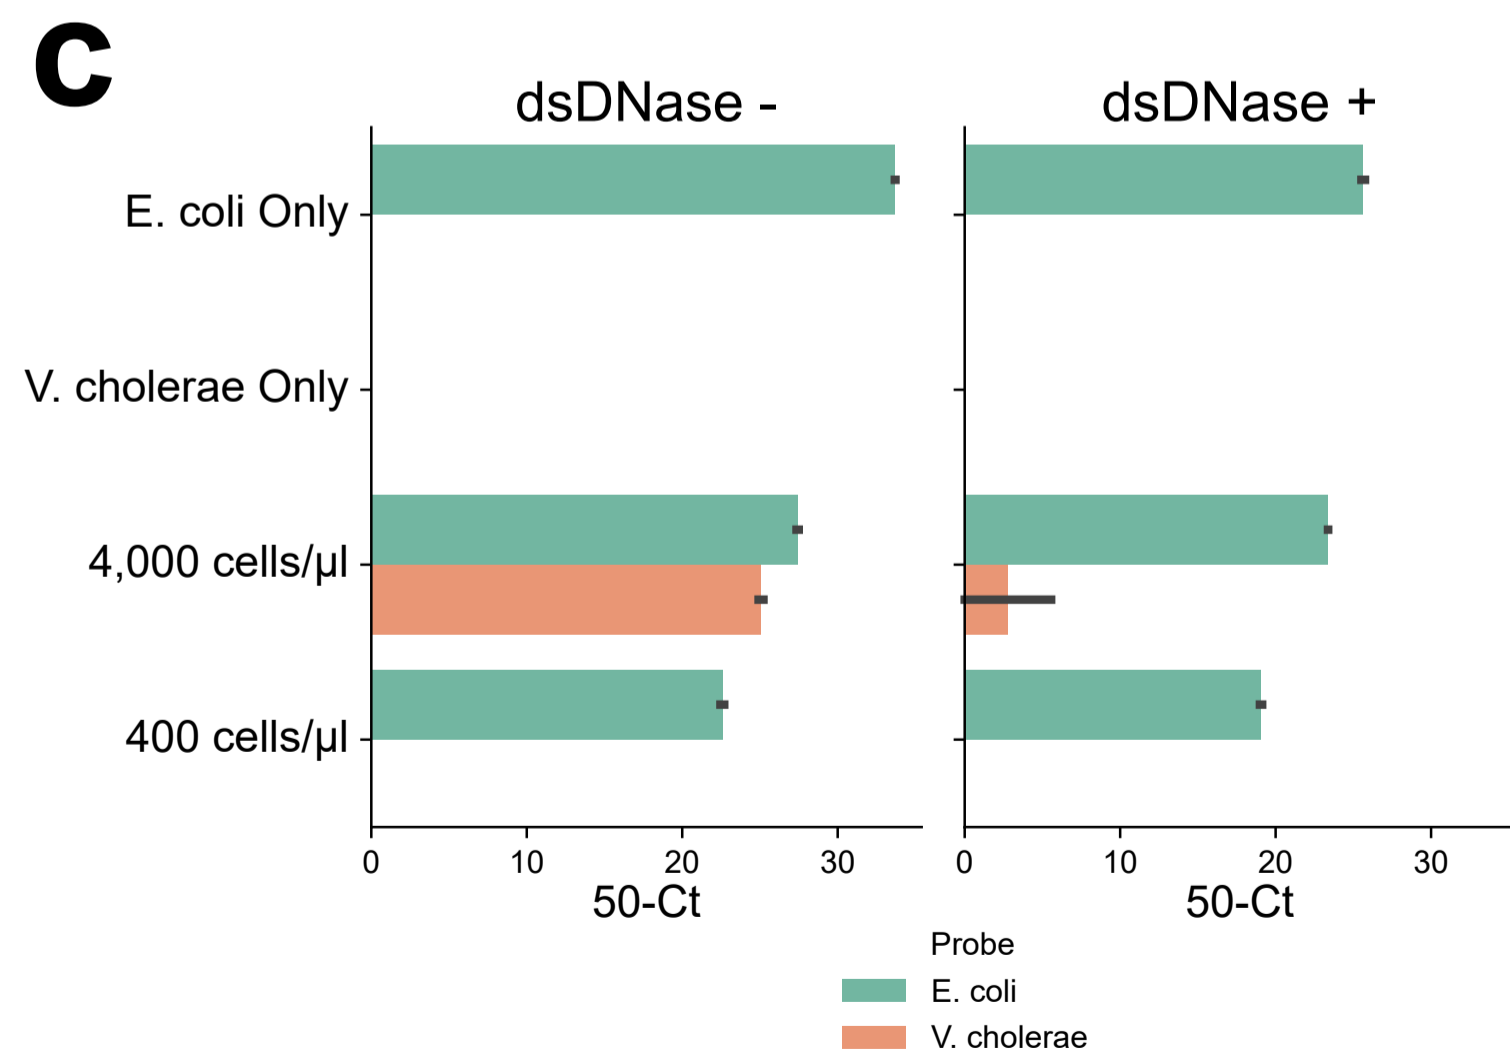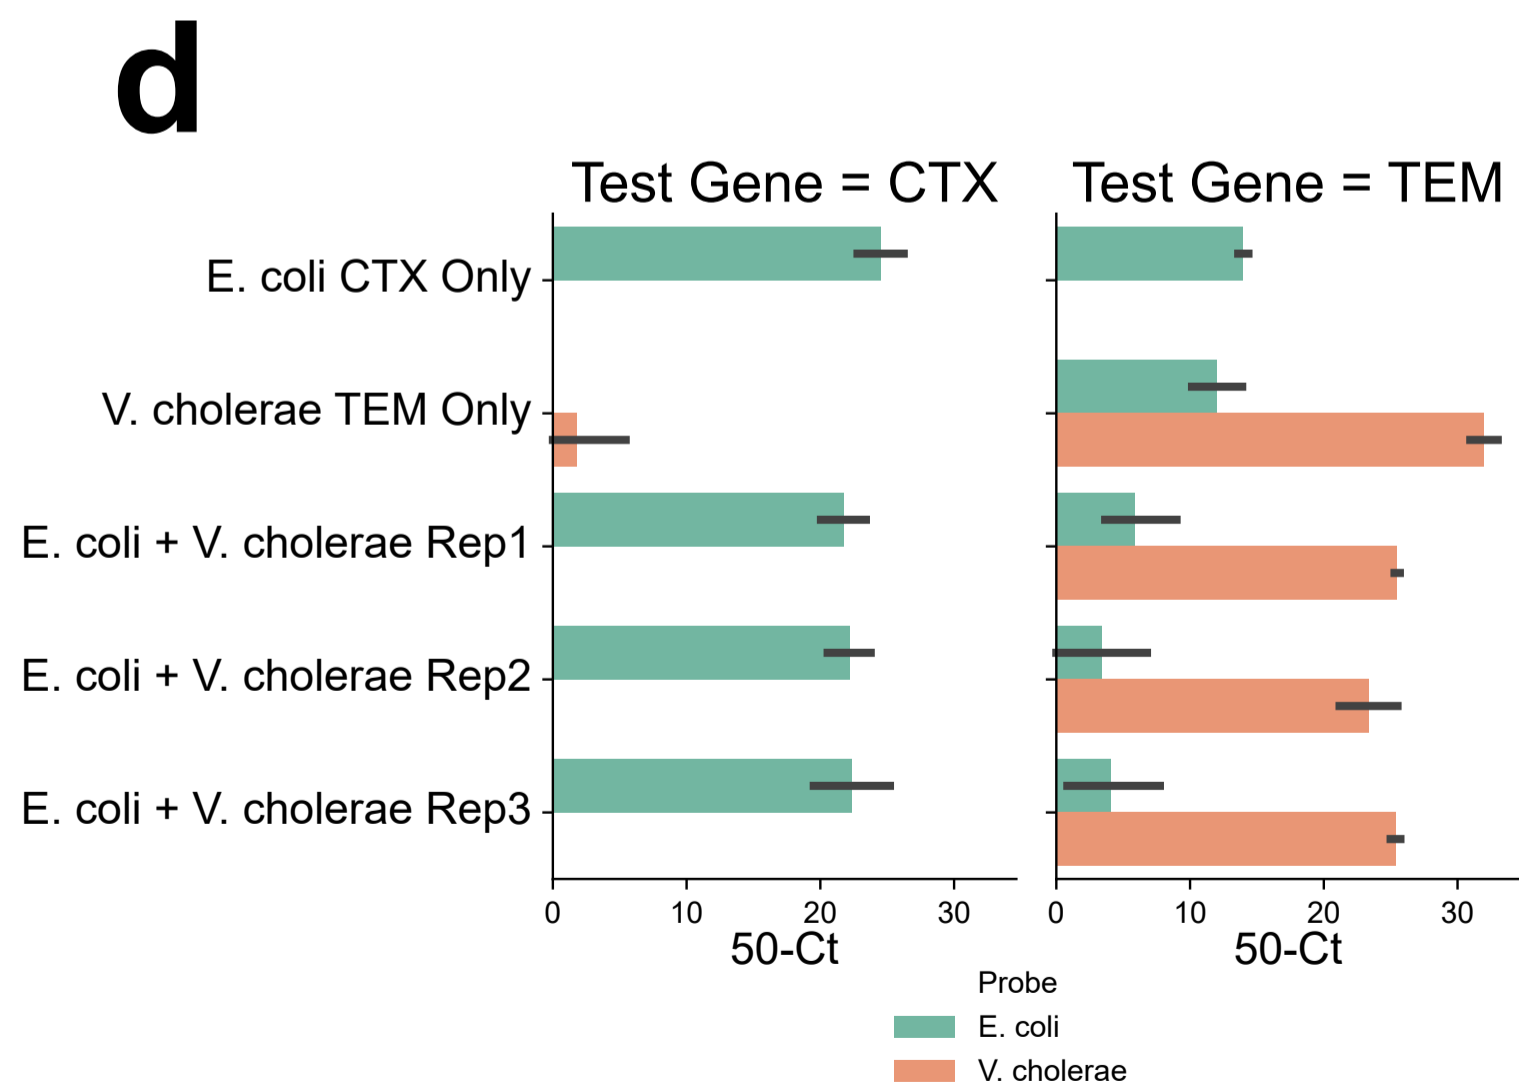

Supplement: supp [file elife_poa_e66834_Figure_1_figure_supplement_3.pdf › elife_poa_e66834_Figure_1_figure_supplement_3.pdf]

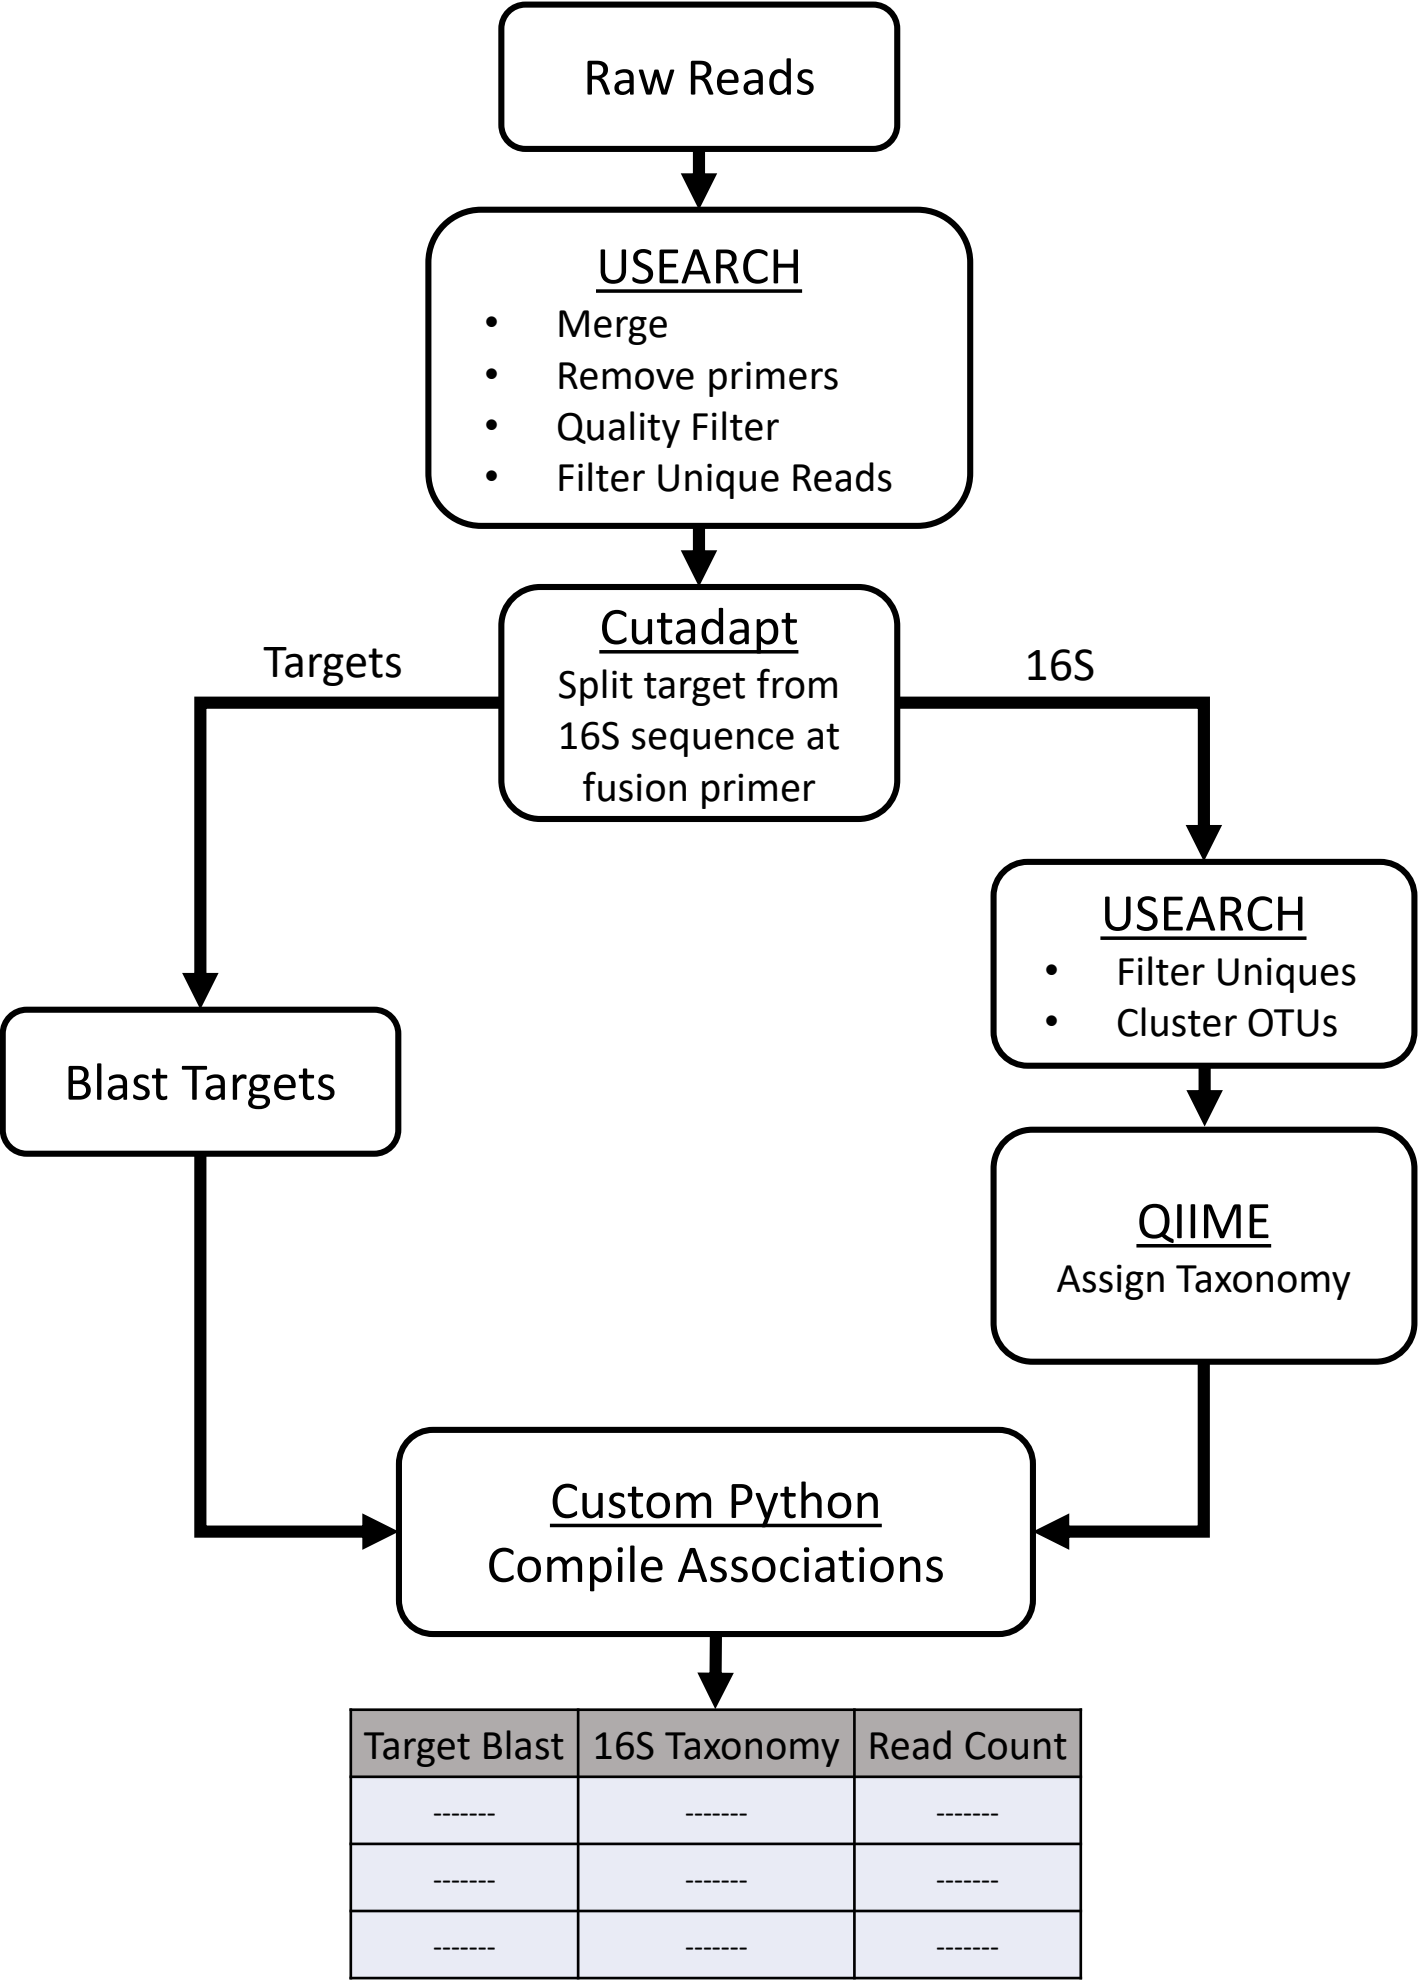

Supplement: supp [file elife_poa_e66834_Figure_1_figure_supplement_4.pdf › elife_poa_e66834_Figure_1_figure_supplement_4.pdf]

## Chicken Stool

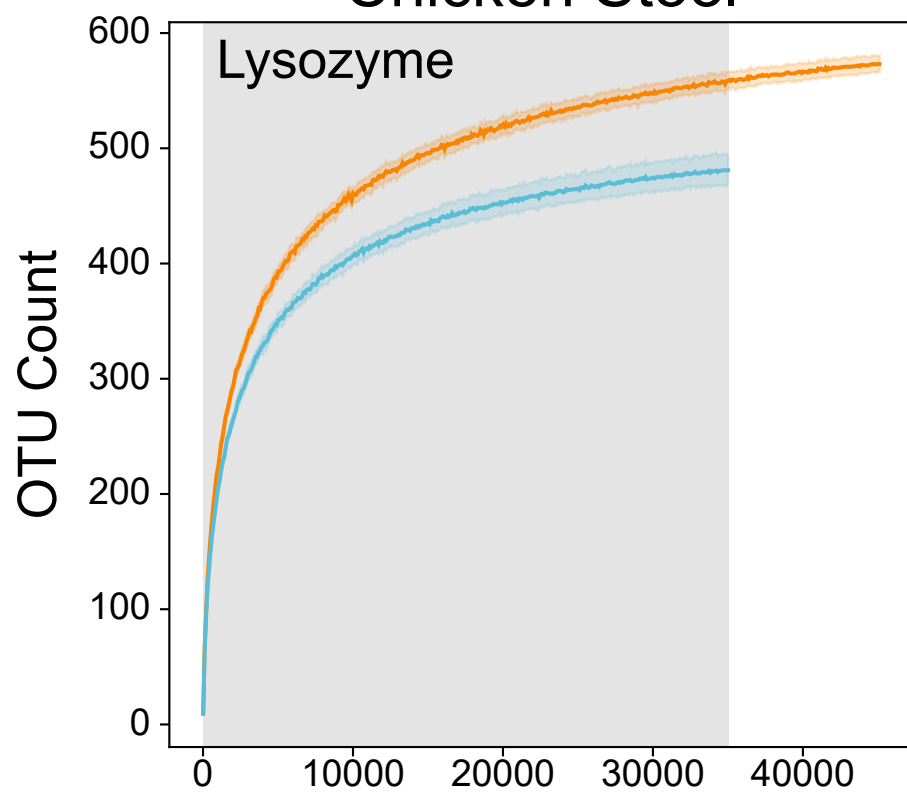

## Human Stool

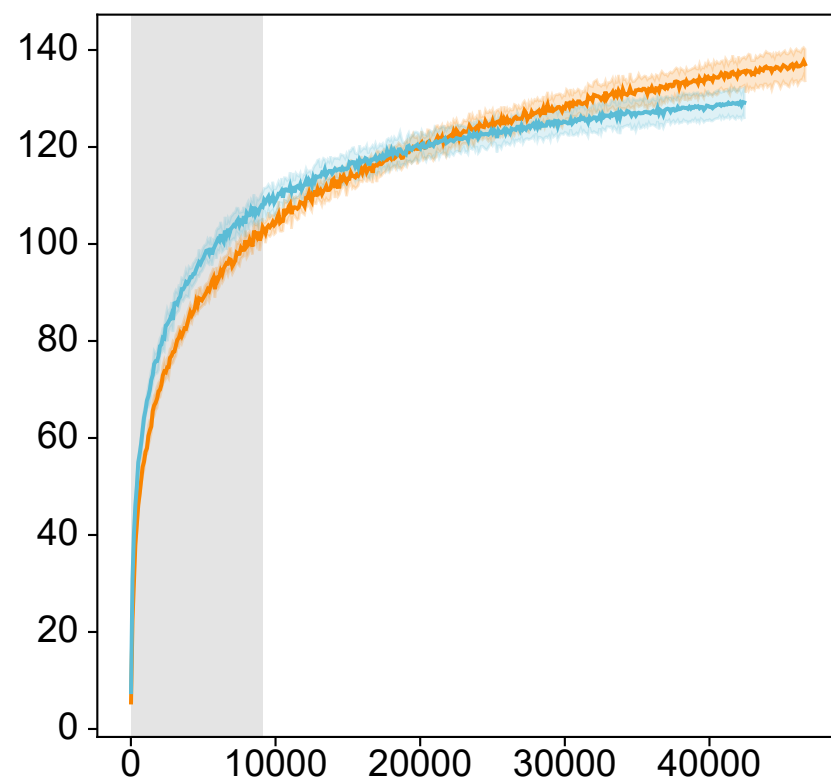

## dsDNase

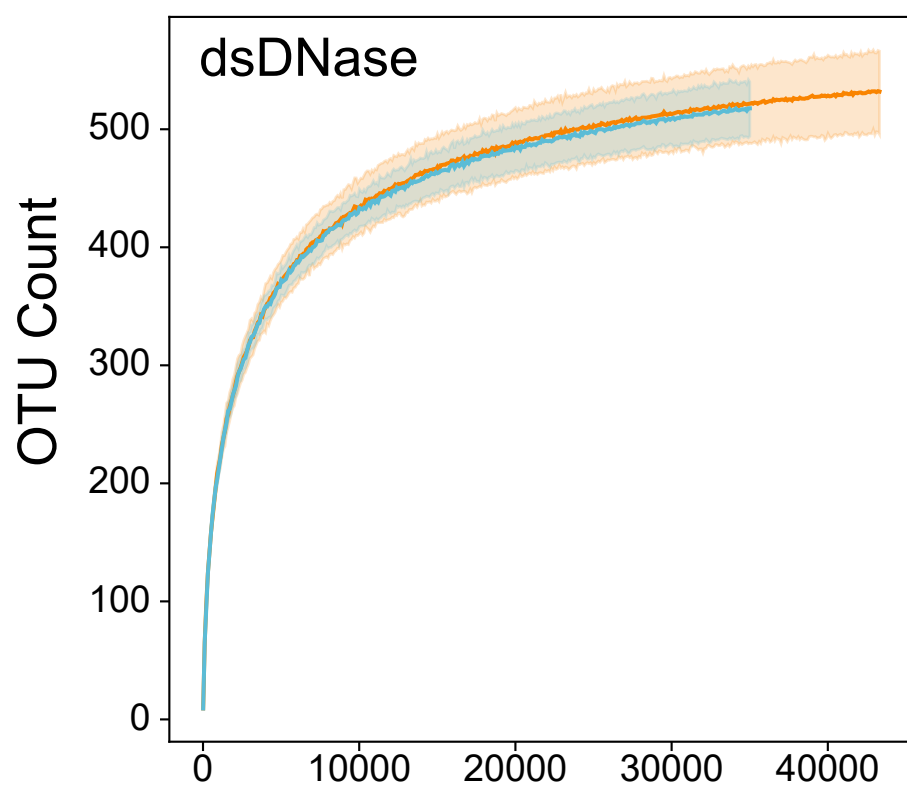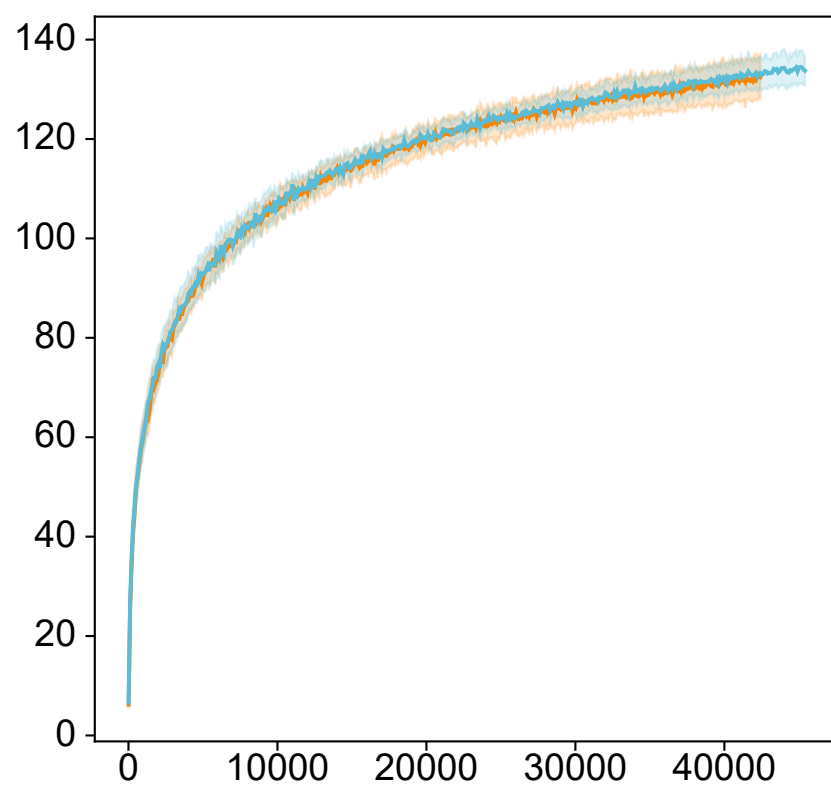

## Heat

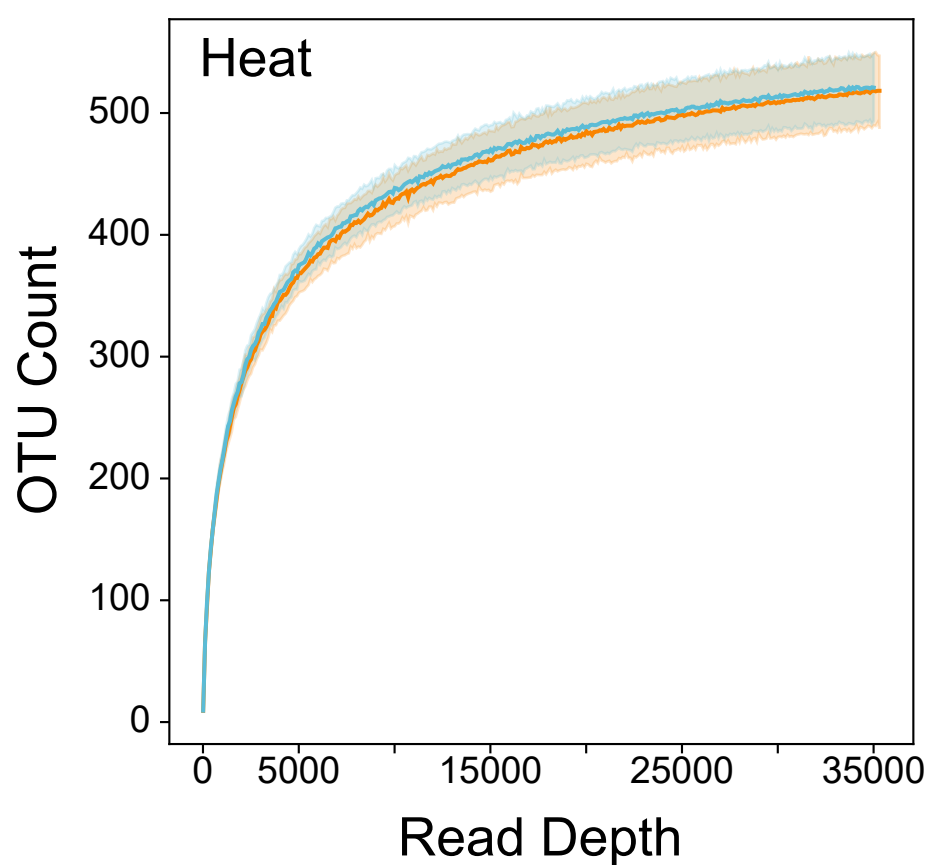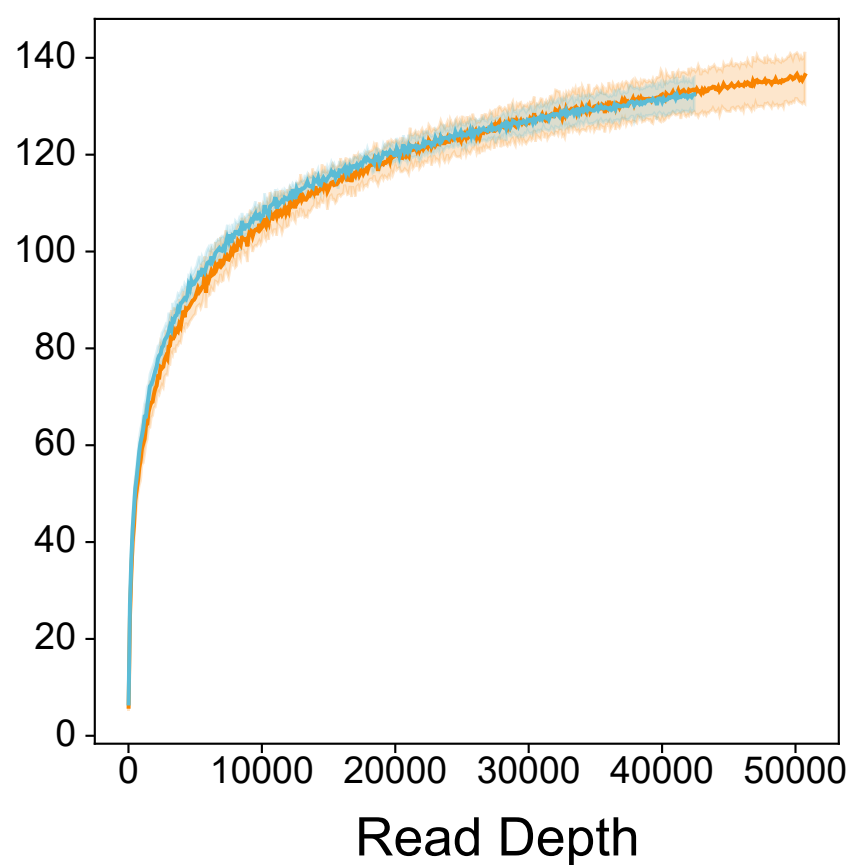

Treatment +  
Treatment -

FDR Corrected  
Welch's T-test < 0.05

Supplement: supp [file elife_poa_e66834_Figure_1_figure_supplement_5.pdf › elife_poa_e66834_Figure_1_figure_supplement_5.pdf]

a. Chicken Stool

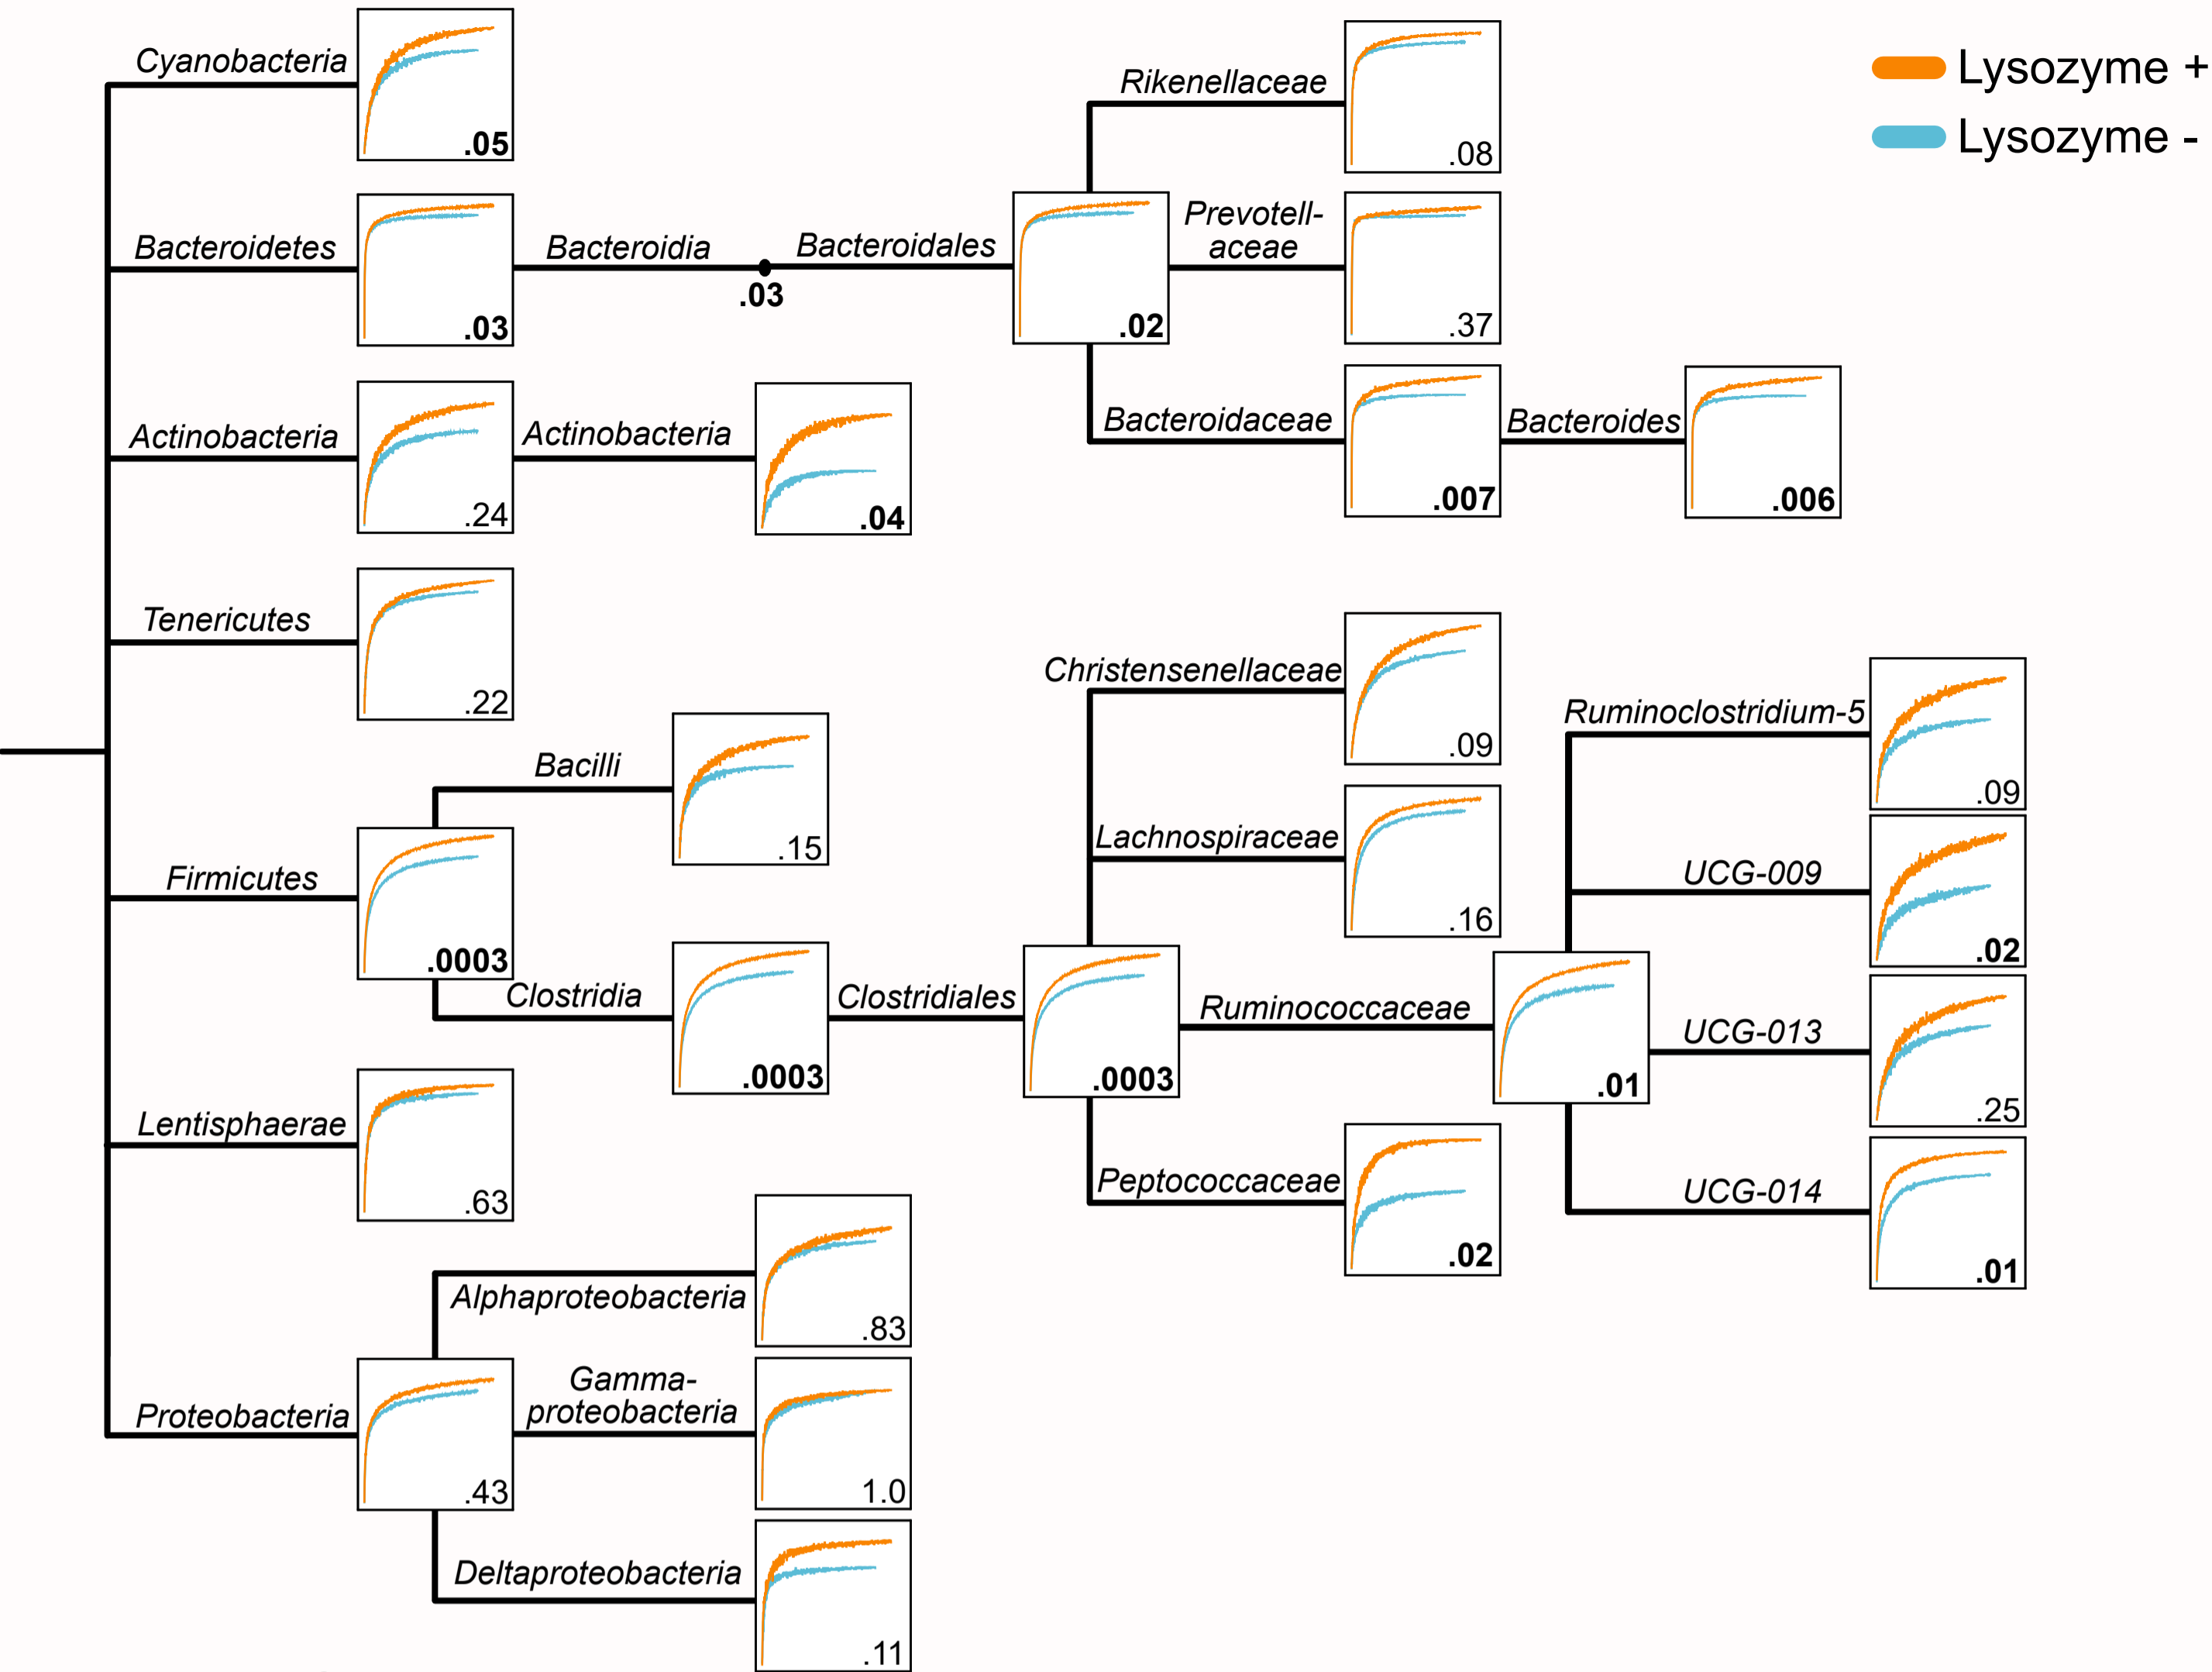

b. Human Stool

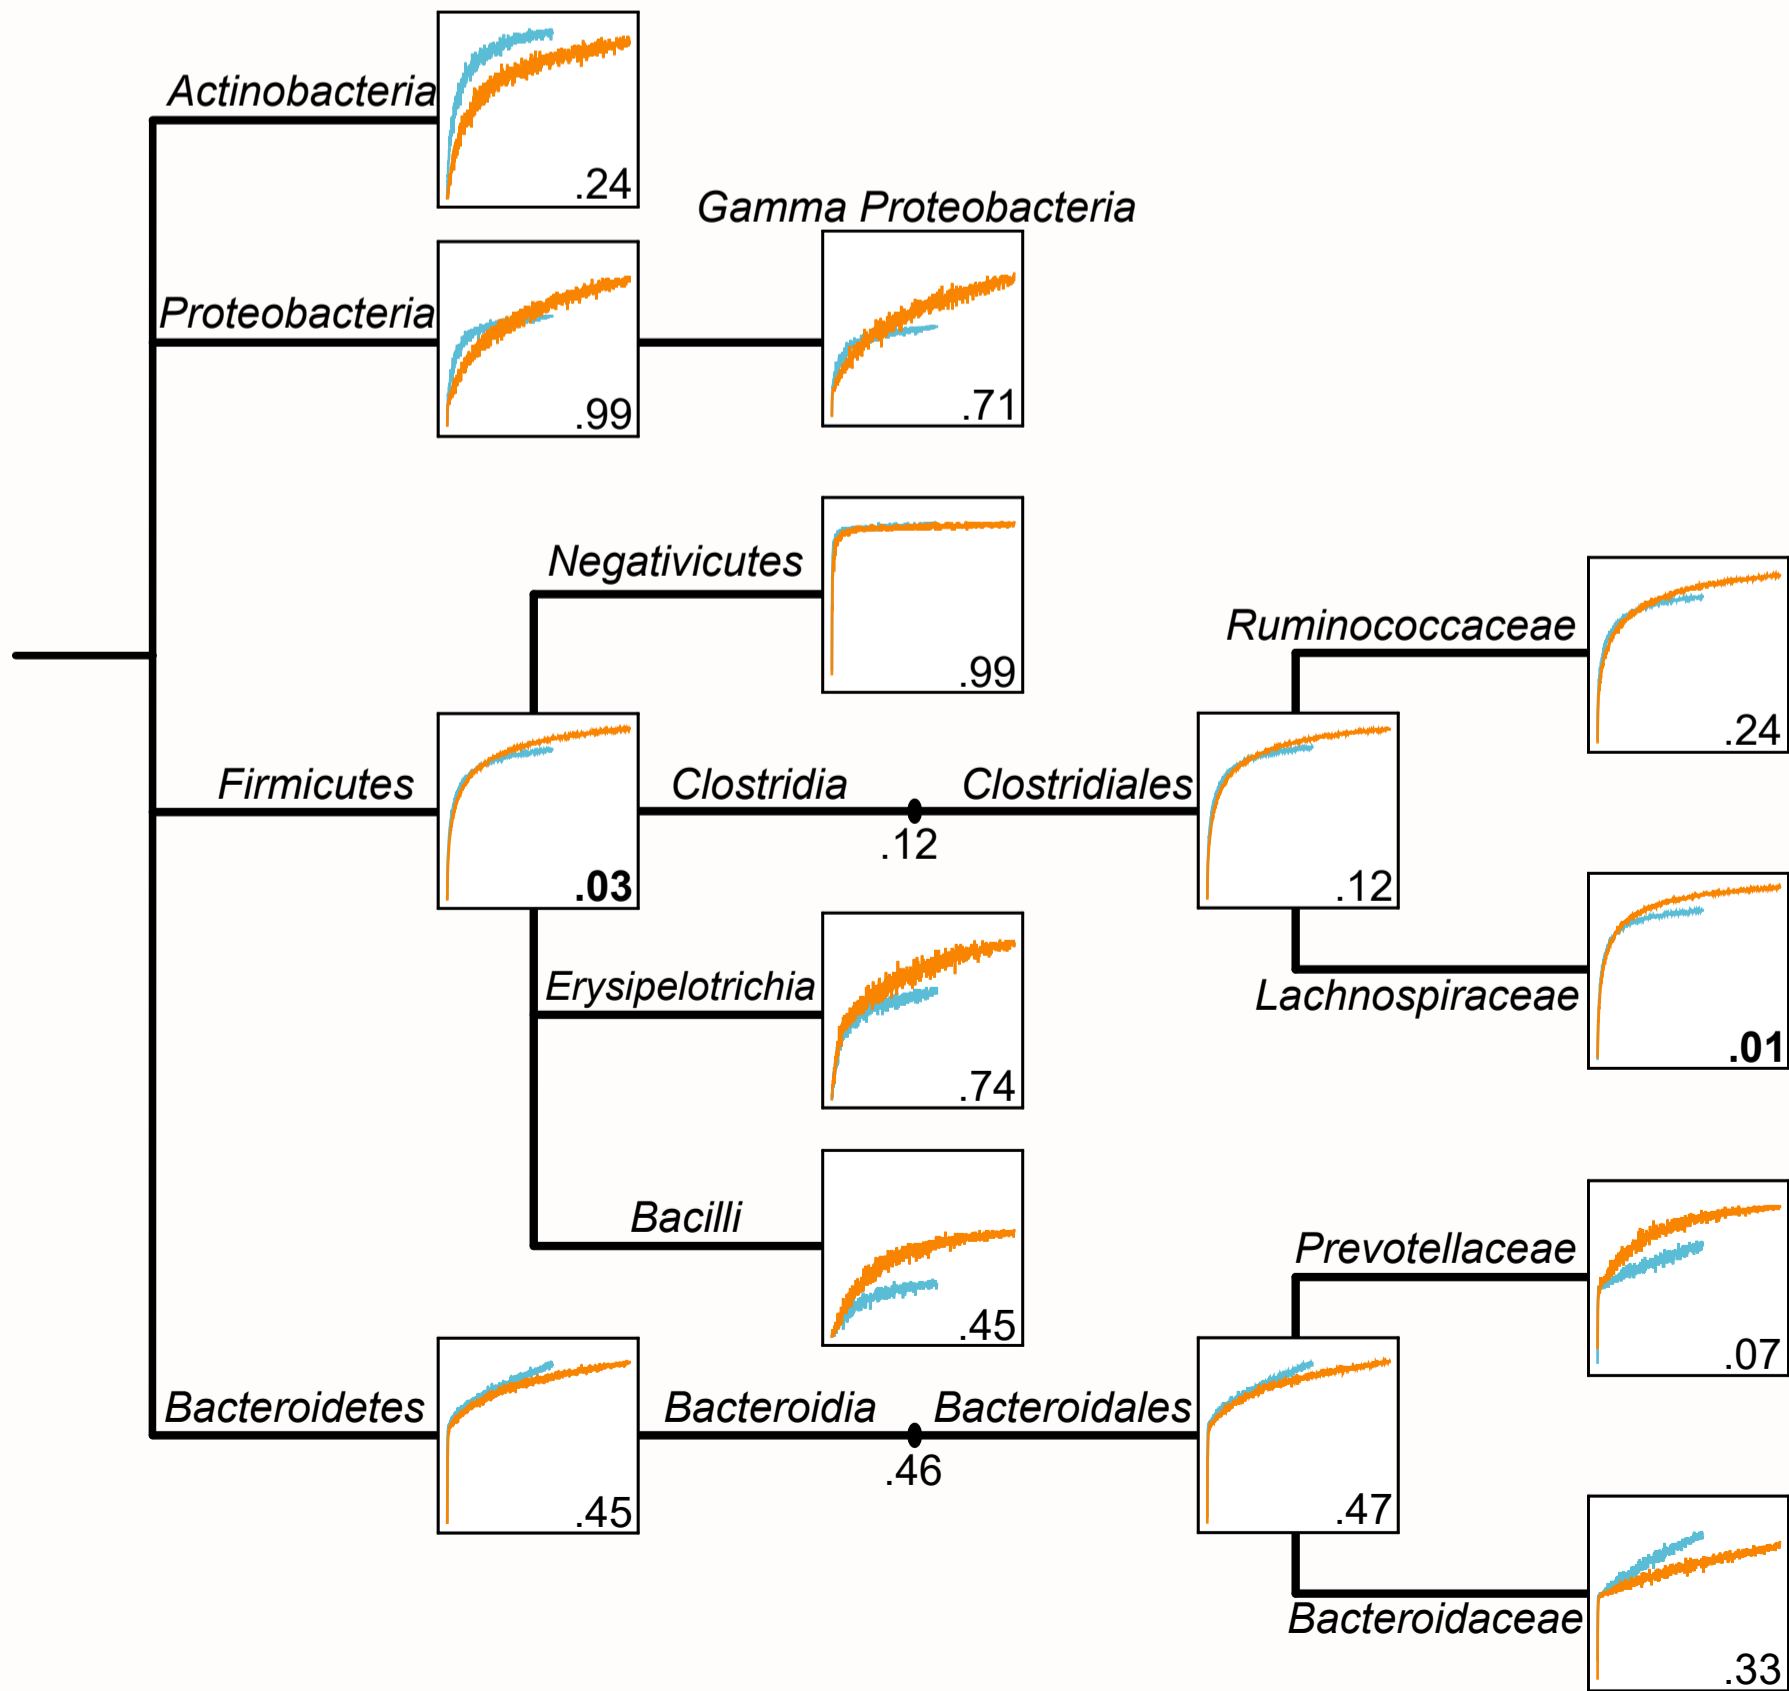

Supplement: supp [file elife_poa_e66834_Figure_1_figure_supplement_6.pdf › elife_poa_e66834_Figure_1_figure_supplement_6.pdf]

Chicken Stool

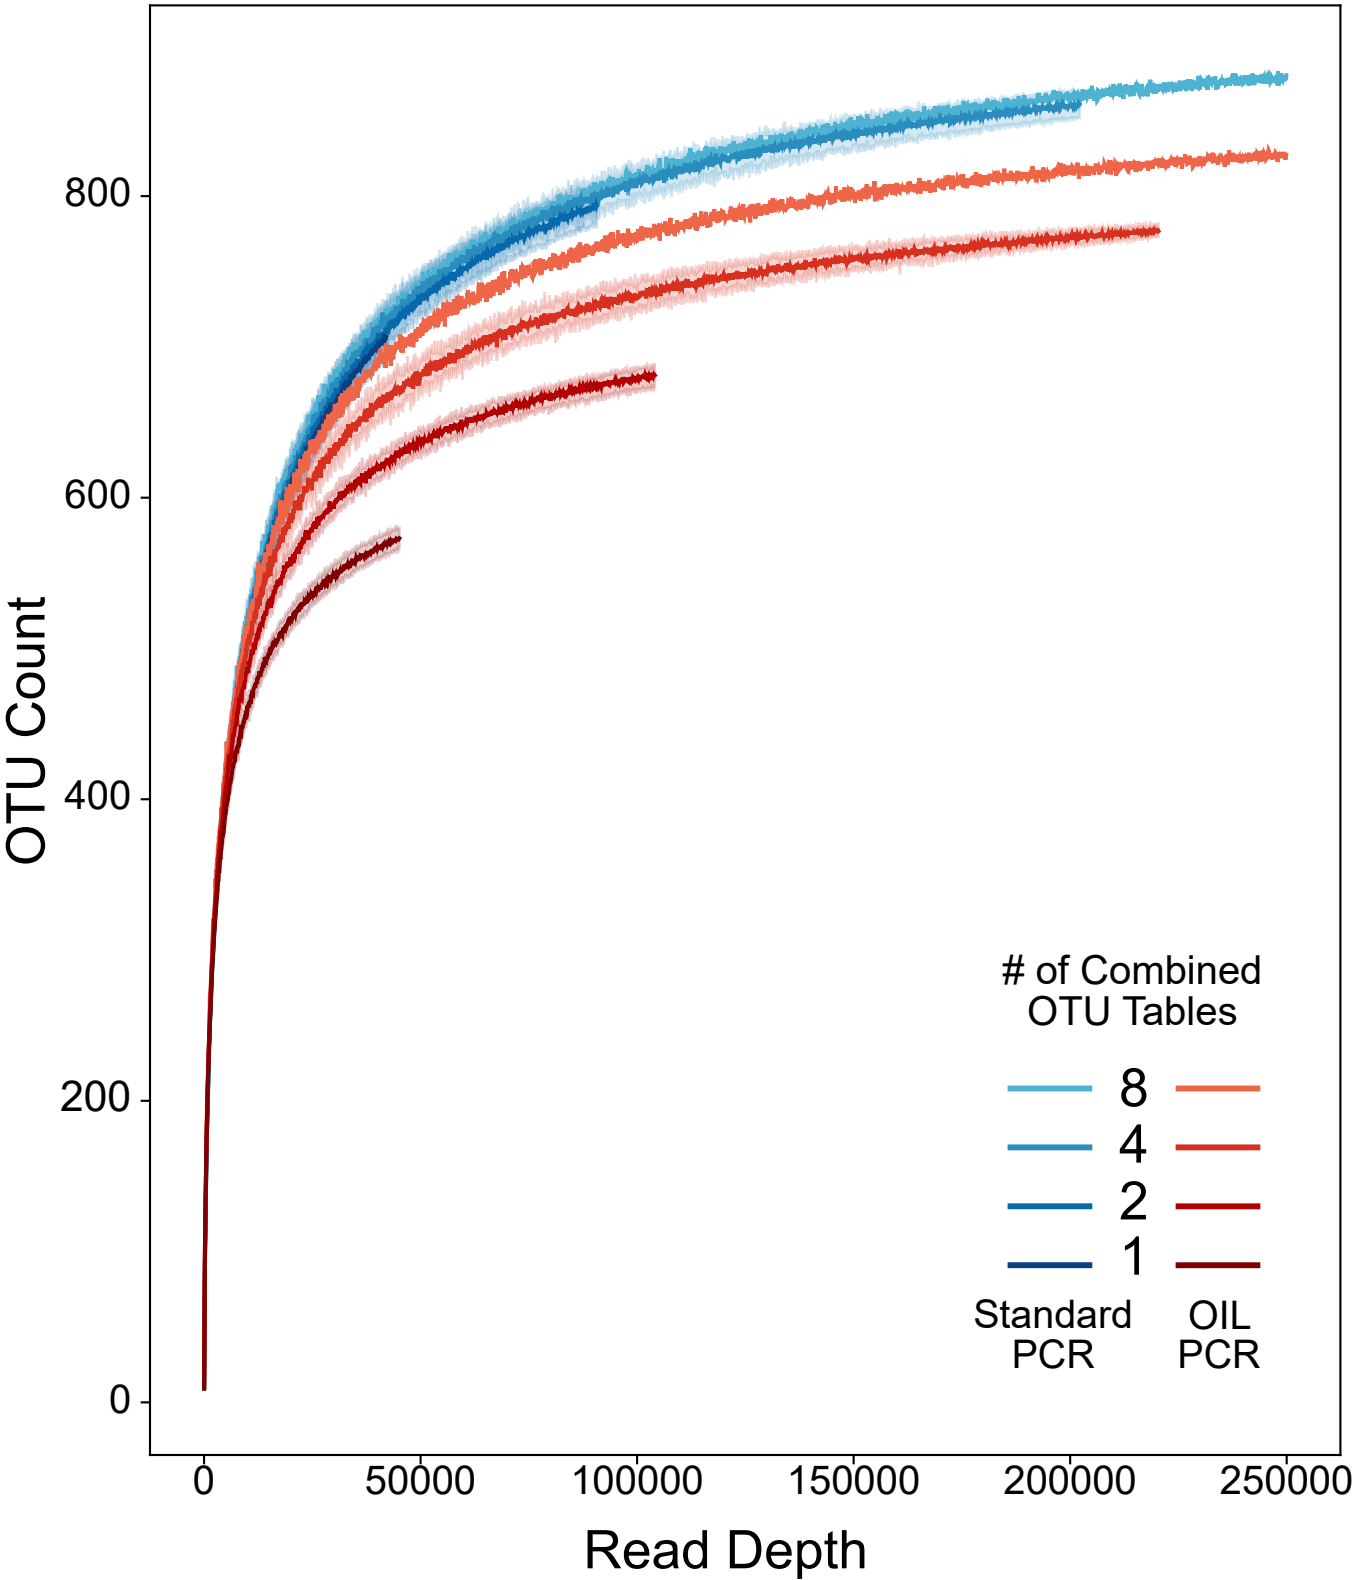

Human Stool

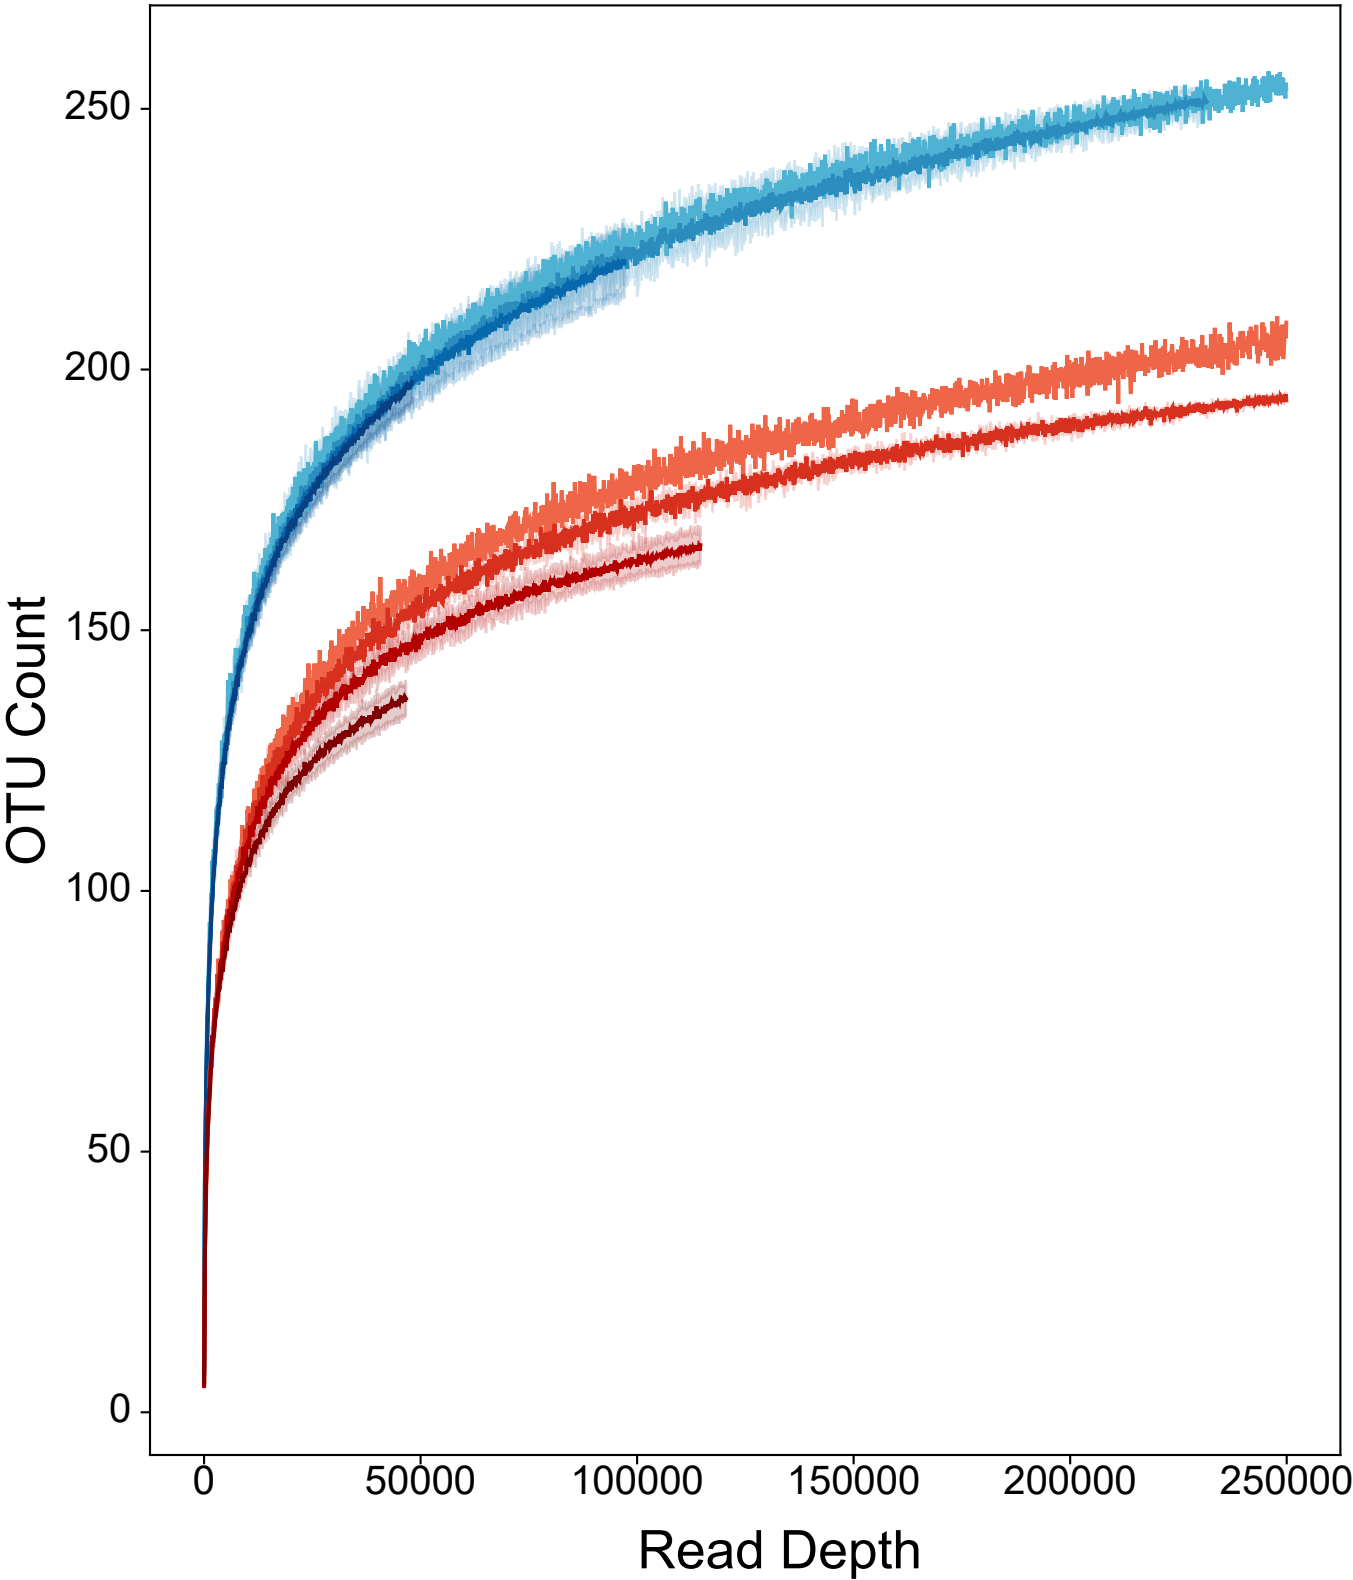

Supplement: supp [file elife_poa_e66834_Figure_1_figure_supplement_7.pdf › elife_poa_e66834_Figure_1_figure_supplement_7.pdf]

% Total Reads

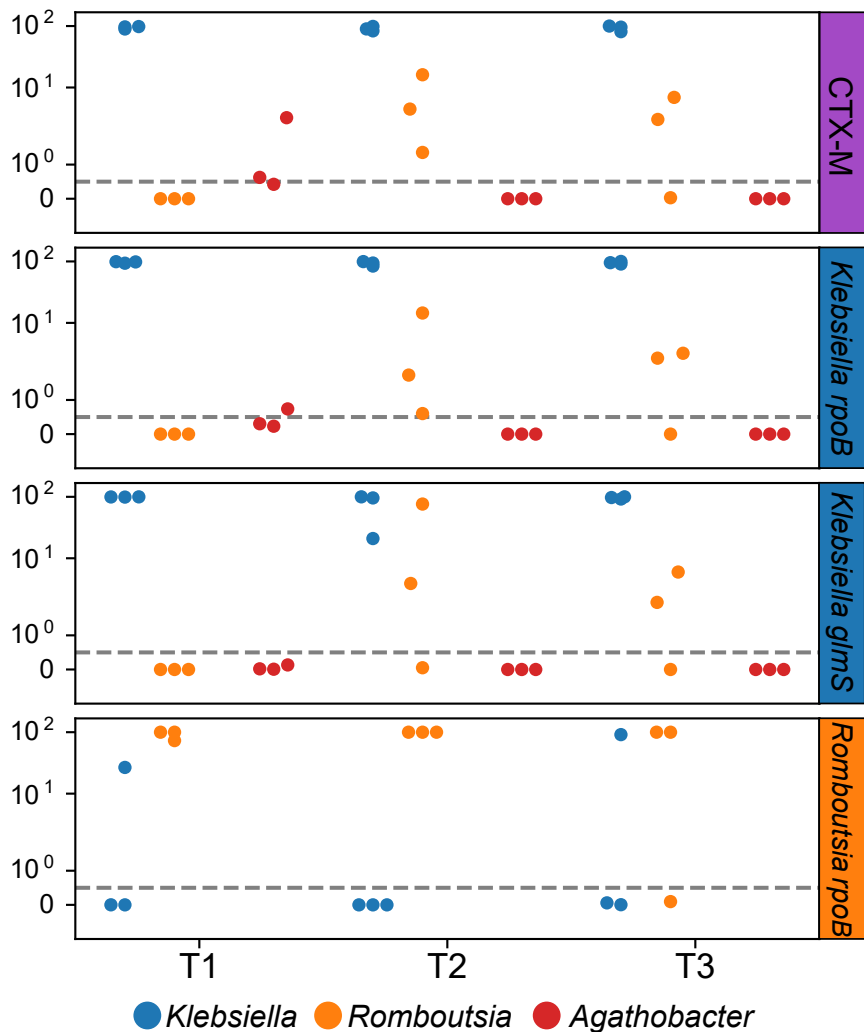

Supplement: supp [file elife_poa_e66834_Figure_3_figure_supplement_1.pdf › elife_poa_e66834_Figure_3_figure_supplement_1.pdf]
